# Supplementary material for: Population genomic analyses of RAD sequences resolves the phylogenetic relationship of the lichen-forming fungal species Usneaantarctica and Usneaaurantiacoatra
Source: PubMed Central journal article supplement (PMC6300515; doi:10.3897/mycokeys.43.29093), 2018-12-12
Supplement: mycokeys-43-091-s003.pdf [file mycokeys-43-091-s003.pdf]

| Specimen Number | Species Name          | MiSeq sequencing | Within sample cluster (loci) | Loci mapped to reference | Percentage mapped | Loci in final dataset | Loci in final dataset (>1000) |
|-----------------|-----------------------|------------------|------------------------------|--------------------------|-------------------|-----------------------|-------------------------------|
| EL0001          | Usnea antarctica      | 556,958          | 22,561                       | 4,915                    | 21.8%             | 4,106                 | 4,108                         |
| EL0002          | Usnea antarctica      | 156,335          | 11,131                       | 2,559                    | 23.0%             | 2,393                 | 2,393                         |
| EL0004          | Usnea antarctica      | 428,463          | 20,713                       | 4,934                    | 23.8%             | 4,081                 | 4,083                         |
| EL0006          | Usnea antarctica      | 294,306          | 19,364                       | 4,424                    | 22.8%             | 4,133                 | 4,133                         |
| EL0010          | Usnea antarctica      | 347,330          | 16,384                       | 3,718                    | 22.7%             | 3,006                 | 3,008                         |
| EL0011          | Usnea antarctica      | 307,277          | 16,342                       | 3,681                    | 22.5%             | 3,029                 | 3,026                         |
| EL0013          | Usnea antarctica      | 376,494          | 19,259                       | 4,570                    | 23.7%             | 3,772                 | 3,774                         |
| EL0015          | Usnea antarctica      | 406,654          | 22,695                       | 5,103                    | 22.5%             | 4,665                 | 4,666                         |
| EL0022          | Usnea antarctica      | 210,615          | 12,658                       | 3,029                    | 23.9%             | 2,380                 | 2,382                         |
| EL0026          | Usnea antarctica      | 1,639,547        | 36,253                       | 8,246                    | 22.7%             | 7,169                 | 7,170                         |
| EL0028          | Usnea antarctica      | 201,408          | 13,476                       | 3,070                    | 22.8%             | 2,852                 | 2,852                         |
| EL0034          | Usnea antarctica      | 188,669          | 13,088                       | 3,006                    | 23.0%             | 2,799                 | 2,799                         |
| EL0040          | Usnea antarctica      | 532,132          | 21,068                       | 4,405                    | 20.9%             | 3,671                 | 3,673                         |
| EL0042          | Usnea antarctica      | 626,833          | 23,759                       | 5,558                    | 23.4%             | 4,720                 | 4,722                         |
| EL0044          | Usnea antarctica      | 799,833          | 28,368                       | 6,640                    | 23.4%             | 5,750                 | 5,752                         |
| EL0045          | Usnea antarctica      | 174,992          | 9,665                        | 2,290                    | 23.7%             | 1,733                 | 1,735                         |
| EL0047          | Usnea antarctica      | 453,480          | 24,895                       | 5,778                    | 23.2%             | 5,210                 | 5,211                         |
| EL0051          | Usnea antarctica      | 803,397          | 28,199                       | 6,695                    | 23.7%             | 5,798                 | 5,800                         |
| EL0052          | Usnea antarctica      | 126,118          | 8,419                        | 1,920                    | 22.8%             | 1,777                 | 1,777                         |
| EL0057          | Usnea antarctica      | 557,873          | 27,533                       | 5,783                    | 21.0%             | 5,200                 | 5,202                         |
| EL0059          | Usnea antarctica      | 13,659           | 63                           | 10                       | 15.9%             | 10                    |                               |
| EL0064          | Usnea aurantiaco-atra | 116,561          | 7,525                        | 1,747                    | 23.2%             | 1,571                 | 1,572                         |
| EL0065          | Usnea aurantiaco-atra | 202,688          | 12,670                       | 2,898                    | 22.9%             | 2,443                 | 2,442                         |
| EL0068          | Usnea aurantiaco-atra | 1,023,871        | 47,973                       | 5,786                    | 12.1%             | 4,883                 | 4,887                         |
| EL0069          | Usnea aurantiaco-atra | 638,013          | 26,113                       | 6,105                    | 23.4%             | 5,257                 | 5,261                         |
| EL0072          | Usnea aurantiaco-atra | 329,200          | 17,358                       | 4,181                    | 24.1%             | 3,425                 | 3,429                         |
| EL0074          | Usnea aurantiaco-atra | 1,942,819        | 55,459                       | 7,531                    | 13.6%             | 6,381                 | 6,385                         |
| EL0082          | Usnea aurantiaco-atra | 313,415          | 16,611                       | 3,839                    | 23.1%             | 3,098                 | 3,103                         |
| EL0085          | Usnea aurantiaco-atra | 589,806          | 29,379                       | 4,360                    | 14.8%             | 3,562                 | 3,566                         |
| EL0086          | Usnea aurantiaco-atra | 643,322          | 25,389                       | 6,099                    | 24.0%             | 5,289                 | 5,293                         |
| EL0087          | Usnea aurantiaco-atra | 538,540          | 22,856                       | 4,833                    | 21.1%             | 3,997                 | 4,001                         |
| EL0088          | Usnea aurantiaco-atra | 1,002,560        | 30,095                       | 7,087                    | 23.5%             | 6,214                 | 6,218                         |
| EL0091          | Usnea aurantiaco-atra | 578,617          | 26,430                       | 5,721                    | 21.6%             | 4,786                 | 4,790                         |
| EL0093          | Usnea aurantiaco-atra | 711,192          | 29,078                       | 5,441                    | 18.7%             | 4,520                 | 4,525                         |
| EL0095          | Usnea aurantiaco-atra | 383,863          | 18,990                       | 4,589                    | 24.2%             | 3,757                 | 3,761                         |
| EL0098          | Usnea aurantiaco-atra | 304,105          | 15,797                       | 3,633                    | 23.0%             | 2,890                 | 2,894                         |
| EL0100          | Usnea aurantiaco-atra | 167,610          | 9,691                        | 2,228                    | 23.0%             | 1,967                 | 1,965                         |
| EL0107          | Usnea aurantiaco-atra | 244,936          | 14,771                       | 3,617                    | 24.5%             | 2,857                 | 2,861                         |
| EL0110          | Usnea aurantiaco-atra | 88,501           | 5,732                        | 1,379                    | 24.1%             | 1,262                 | 1,260                         |
| EL0111          | Usnea aurantiaco-atra | 755,220          | 31,945                       | 5,190                    | 16.2%             | 4,313                 | 4,317                         |
| EL0113          | Usnea aurantiaco-atra | 837,008          | 36,040                       | 5,563                    | 15.4%             | 4,641                 | 4,645                         |
| EL0114          | Usnea aurantiaco-atra | 128,508          | 8,310                        | 1,917                    | 23.1%             | 1,696                 | 1,696                         |
| EL0115          | Usnea aurantiaco-atra | 401,037          | 19,826                       | 4,814                    | 24.3%             | 3,999                 | 4,003                         |

|        |                       |           |        |       |       |       |       |
|--------|-----------------------|-----------|--------|-------|-------|-------|-------|
| EL0118 | Usnea aurantiaco-atra | 623,414   | 29,417 | 5,001 | 17.0% | 4,111 | 4,115 |
| EL0121 | Usnea aurantiaco-atra | 1,256,791 | 34,172 | 8,018 | 23.5% | 6,936 | 6,941 |
| EL0124 | Usnea aurantiaco-atra | 287,888   | 15,019 | 3,635 | 24.2% | 2,849 | 2,852 |
| EL0375 | Usnea antarctica      | 608,102   | 24,878 | 5,924 | 23.8% | 5,017 | 5,020 |
| EL0377 | Usnea antarctica      | 457,290   | 25,467 | 5,385 | 21.1% | 4,879 | 4,880 |
| EL0380 | Usnea antarctica      | 650,500   | 34,318 | 6,348 | 18.5% | 5,688 | 5,690 |
| EL0381 | Usnea antarctica      | 57,322    | 1,624  | 312   | 19.2% | 297   |       |
| EL0382 | Usnea antarctica      | 602,744   | 25,718 | 5,907 | 23.0% | 4,994 | 4,996 |
| EL0387 | Usnea antarctica      | 509,889   | 27,727 | 6,022 | 21.7% | 5,389 | 5,390 |
| EL0390 | Usnea antarctica      | 316,809   | 16,815 | 3,953 | 23.5% | 3,178 | 3,180 |
| EL0393 | Usnea antarctica      | 415,861   | 19,531 | 4,546 | 23.3% | 3,787 | 3,789 |
| EL0396 | Usnea antarctica      | 1,033,299 | 45,350 | 7,179 | 15.8% | 6,280 | 6,282 |
| EL0397 | Usnea antarctica      | 277,565   | 16,040 | 3,815 | 23.8% | 3,069 | 3,071 |
| EL0398 | Usnea antarctica      | 675,252   | 30,271 | 6,841 | 22.6% | 5,994 | 5,996 |
| EL0402 | Usnea antarctica      | 401,543   | 19,930 | 4,822 | 24.2% | 3,948 | 3,950 |
| EL0408 | Usnea antarctica      | 825,308   | 35,339 | 6,633 | 18.8% | 5,881 | 5,883 |
| EL0409 | Usnea antarctica      | 391,229   | 18,947 | 4,396 | 23.2% | 3,582 | 3,584 |
| EL0410 | Usnea antarctica      | 777,413   | 37,711 | 6,564 | 17.4% | 5,819 | 5,820 |
| EL0413 | Usnea antarctica      | 205,831   | 12,412 | 2,897 | 23.3% | 2,265 | 2,267 |
| EL0415 | Usnea aurantiaco-atra | 42,389    | 1,887  | 443   | 23.5% | 408   |       |
| EL0416 | Usnea aurantiaco-atra | 751,019   | 25,530 | 5,761 | 22.6% | 4,823 | 4,827 |
| EL0417 | Usnea aurantiaco-atra | 623,045   | 26,611 | 6,309 | 23.7% | 5,368 | 5,372 |
| EL0419 | Usnea aurantiaco-atra | 1,288,183 | 49,256 | 5,905 | 12.0% | 4,945 | 4,949 |
| EL0420 | Usnea aurantiaco-atra | 622,806   | 31,966 | 5,148 | 16.1% | 4,254 | 4,258 |
| EL0423 | Usnea aurantiaco-atra | 453,929   | 18,105 | 4,071 | 22.5% | 3,294 | 3,297 |
| EL0426 | Usnea aurantiaco-atra | 348,399   | 18,815 | 4,644 | 24.7% | 3,790 | 3,794 |
| EL0429 | Usnea aurantiaco-atra | 573,360   | 22,980 | 5,163 | 22.5% | 4,301 | 4,305 |
| EL0430 | Usnea aurantiaco-atra | 344,277   | 18,128 | 4,423 | 24.4% | 3,667 | 3,671 |
| EL0431 | Usnea aurantiaco-atra | 735,439   | 27,213 | 5,587 | 20.5% | 4,697 | 4,701 |
| EL0432 | Usnea aurantiaco-atra | 656,918   | 26,007 | 6,354 | 24.4% | 5,475 | 5,479 |
| EL0435 | Usnea aurantiaco-atra | 174,671   | 7,725  | 1,880 | 24.3% | 1,303 | 1,306 |
| EL0437 | Usnea aurantiaco-atra | 77,221    | 3,090  | 746   | 24.1% | 469   |       |
| EL0441 | Usnea aurantiaco-atra | 820,039   | 28,747 | 6,563 | 22.8% | 5,699 | 5,703 |
| EL0442 | Usnea aurantiaco-atra | 363,275   | 18,901 | 3,432 | 18.2% | 2,607 | 2,612 |
| EL0444 | Usnea aurantiaco-atra | 404,154   | 18,331 | 4,392 | 24.0% | 3,551 | 3,554 |
| EL0445 | Usnea aurantiaco-atra | 206,372   | 10,974 | 2,222 | 20.2% | 1,583 | 1,586 |
| EL0449 | Usnea aurantiaco-atra | 253,377   | 13,104 | 2,967 | 22.6% | 2,211 | 2,214 |
| EL0450 | Usnea aurantiaco-atra | 385,470   | 21,179 | 5,208 | 24.6% | 4,356 | 4,360 |
| EL0453 | Usnea aurantiaco-atra | 464,018   | 22,385 | 4,584 | 20.5% | 3,643 | 3,647 |
| EL0454 | Usnea aurantiaco-atra | 817,117   | 28,409 | 6,900 | 24.3% | 5,901 | 5,905 |
| EL0455 | Usnea aurantiaco-atra | 460,912   | 22,076 | 5,370 | 24.3% | 4,488 | 4,492 |
| EL0610 | Usnea antarctica      | 789,315   | 33,454 | 6,929 | 20.7% | 6,087 | 6,089 |
| EL0619 | Usnea antarctica      | 357,139   | 22,189 | 5,154 | 23.2% | 4,607 | 4,608 |
| EL0622 | Usnea antarctica      | 274,638   | 18,005 | 4,172 | 23.2% | 3,734 | 3,735 |
| EL0634 | Usnea antarctica      | 388,312   | 20,748 | 4,806 | 23.2% | 4,274 | 4,275 |
| EL0636 | Usnea antarctica      | 496,502   | 23,176 | 4,114 | 17.8% | 3,708 | 3,708 |
| EL0653 | Usnea antarctica      | 244,311   | 15,567 | 3,682 | 23.7% | 3,324 | 3,325 |

|        |                  |         |        |       |       |       |       |
|--------|------------------|---------|--------|-------|-------|-------|-------|
| EL0661 | Usnea antarctica | 740,280 | 48,830 | 6,075 | 12.4% | 5,333 | 5,333 |
| EL0663 | Usnea antarctica | 382,187 | 22,285 | 4,814 | 21.6% | 4,253 | 4,254 |
| EL0668 | Usnea antarctica | 450,918 | 25,702 | 5,615 | 21.8% | 4,913 | 4,913 |
| EL0706 | Usnea antarctica | 330,495 | 18,424 | 3,987 | 21.6% | 3,607 | 3,607 |
| EL0713 | Usnea antarctica | 286,634 | 17,397 | 3,799 | 21.8% | 3,465 | 3,466 |
| EL0715 | Usnea antarctica | 226,991 | 14,425 | 3,290 | 22.8% | 3,054 | 3,054 |
| EL0718 | Usnea antarctica | 537,289 | 25,927 | 5,999 | 23.1% | 5,361 | 5,362 |
| EL0723 | Usnea antarctica | 688,297 | 29,979 | 6,517 | 21.7% | 5,802 | 5,804 |
| EL0743 | Usnea antarctica | 672,100 | 31,321 | 6,351 | 20.3% | 5,621 | 5,623 |
| EL0746 | Usnea antarctica | 361,687 | 22,251 | 5,186 | 23.3% | 4,663 | 4,665 |
| EL0756 | Usnea antarctica | 257,965 | 18,131 | 4,316 | 23.8% | 3,936 | 3,937 |
| EL0762 | Usnea antarctica | 339,665 | 20,967 | 4,808 | 22.9% | 4,344 | 4,345 |
| EL0783 | Usnea antarctica | 335,663 | 21,587 | 5,159 | 23.9% | 4,623 | 4,623 |
| EL0797 | Usnea antarctica | 306,453 | 19,557 | 4,485 | 22.9% | 4,002 | 4,001 |
| EL0800 | Usnea antarctica | 438,075 | 24,271 | 5,491 | 22.6% | 4,837 | 4,836 |
